# Supplementary material
Source: PubMed Central journal article supplement (PMC404009)
Supplement: mbc_15_5_2116__3.pdf [file mbc_15_5_2116__3.pdf]

Supplementary Table. Evaluation of alternative Crosslinking Orientation Biases

| Components |   |   |   | Mts bound* | Minus-end **<br>area | Expected<br>result | Simulation<br>result |
|------------|---|---|---|------------|----------------------|--------------------|----------------------|
| D          | H | M | E |            |                      | tightly focused    |                      |
| p          | p | p | p | 20.6 ± 2.5 | 4.7 ± 2.2            |                    | loosely focused      |
| p          | p | p | i | 8.9 ± 5.3  | -                    |                    | no organization      |
| p          | p | i | p | 21.9 ± 4.7 | 4.3 ± 1.4            |                    | loosely focused      |
| p          | p | i | i | 26.7 ± 2.9 | 2.3 ± 1.2            |                    | tightly focused      |
| i          | p | p | p | 22.8 ± 1.0 | 5.2 ± 1.6            |                    | loosely focused      |
| i          | p | p | i | 26.0 ± 2.8 | 2.8 ± 1.2            |                    | tightly focused      |
| i          | p | i | p | 27.3 ± 1.5 | 2.0 ± 1.5            |                    | tightly focused      |
| i          | p | i | i | 28.2 ± 1.6 | 2.0 ± 0.4            |                    | tightly focused      |
| p          | i | p | p | 21.7 ± 1.6 | 5.2 ± 2.6            |                    | loosely focused      |
| p          | i | p | i | 24.2 ± 3.3 | 1.9 ± 1.1            |                    | tightly focused      |
| p          | i | i | p | 25.8 ± 3.1 | 2.6 ± 1.7            |                    | tightly focused      |
| p          | i | i | i | 24.9 ± 2.5 | 1.8 ± 2.2            |                    | tightly focused      |
| i          | i | p | p | 24.3 ± 4.2 | 2.6 ± 0.7            |                    | tightly focused      |
| i          | i | p | i | 27.2 ± 2.5 | 2.8 ± 0.5            |                    | tightly focused      |
| i          | i | i | p | 26.5 ± 2.3 | 2.1 ± 1.3            |                    | tightly focused      |
| i          | i | i | i | 25.9 ± 2.2 | 1.9 ± 1.1            |                    | tightly focused      |
| D          | H | M |   |            |                      | loosely focused    |                      |
| p          | p | p | - | 21.3 ± 2.2 | 4.9 ± 2.0            |                    | loosely focused      |
| p          | p | i | - | 24.3 ± 3.1 | 4.0 ± 1.6            |                    | loosely focused***   |
| i          | p | p | - | 22.9 ± 2.3 | 4.8 ± 1.9            |                    | loosely focused      |
| i          | p | i | - | 24.6 ± 1.9 | 2.9 ± 1.6            |                    | tightly focused***   |
| p          | i | p | - | 23.4 ± 1.8 | 2.6 ± 2.3            |                    | tightly focused***   |
| p          | i | i | - | 27.3 ± 1.8 | 2.2 ± 1.4            |                    | tightly focused      |
| i          | i | p | - | 25.7 ± 1.9 | 2.6 ± 1.5            |                    | tightly focused      |
| i          | i | i | - | 27.0 ± 1.7 | 2.2 ± 1.5            |                    | tightly focused      |
| D          |   | M |   |            |                      | tightly focused    |                      |
| p          | - | p | - | 6.9 ± 2.4  | -                    |                    | no organization      |
| p          | - | i | - | 27.8 ± 2.2 | 2.8 ± 1.2            |                    | tightly focused      |
| i          | - | p | - | 5.3 ± 2.2  | -                    |                    | no organization      |
| i          | - | i | - | 25.9 ± 3.8 | 2.2 ± 1.7            |                    | tightly focused      |
|            | H | M |   |            |                      | tightly focused    |                      |
| -          | p | p | - | 4.8 ± 1.8  | -                    |                    | no organization      |
| -          | p | i | - | 26.4 ± 3.3 | 1.8 ± 0.7            |                    | tightly focused      |
| -          | i | p | - | 5.2 ± 3.0  | -                    |                    | no organization      |
| -          | i | i | - | 25.2 ± 1.8 | 2.4 ± 1.8            |                    | tightly focused      |
| D          | H |   |   |            |                      | loosely focused    |                      |
| p          | p | - | - | 20.9 ± 3.3 | 5.2 ± 1.8            |                    | loosely focused      |
| i          | p | - | - | 21.8 ± 3.2 | 2.2 ± 1.0            |                    | tightly focused      |
| p          | i | - | - | 21.6 ± 2.9 | 2.8 ± 1.2            |                    | tightly focused      |
| i          | i | - | - | 23.4 ± 3.8 | 2.5 ± 1.2            |                    | tightly focused      |

p = parallel, I = indiscriminate, D = dynein, H = HSET, E = Eg5, M = Minus-End Crosslinking

\* = Number of microtubules bound to one another at their minus-ends in the final frame, mean ± S.D., five trials of 30 microtubules each

\*\* = Area occupied by minus-ends in the final frame, mean ± S.D.

\*\*\* = mean ± S.D., ten trials of 30 microtubules each
