# Supplementary material
Source: PubMed Central journal article supplement (PMC404009)

**A**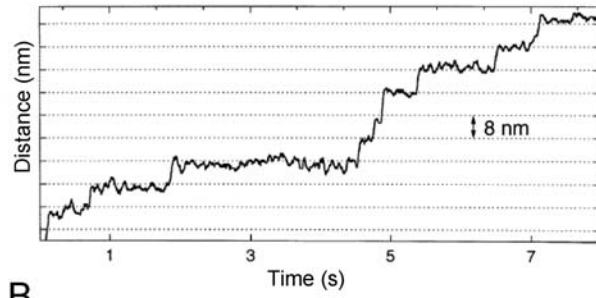**B**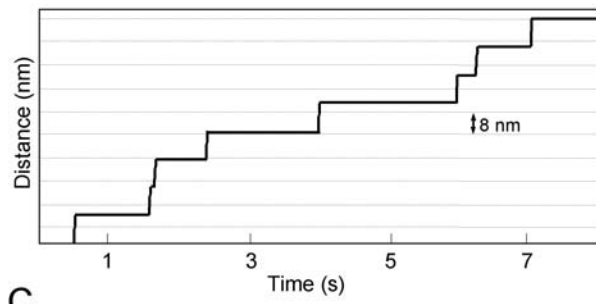**C**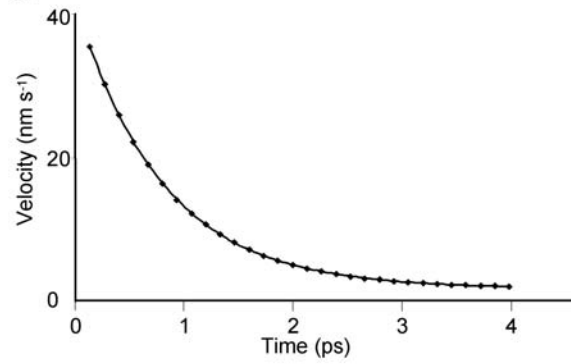**D**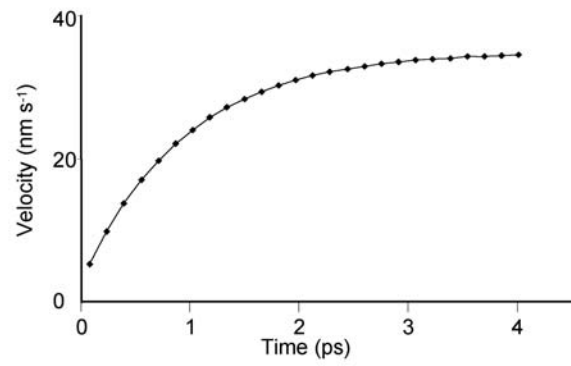

Supplement: mbc_15_5_2116__1.pdf [file mbc_15_5_2116__1.pdf]

|   | Initial                                                                             | Final                                                                                |
|---|-------------------------------------------------------------------------------------|--------------------------------------------------------------------------------------|
| A | 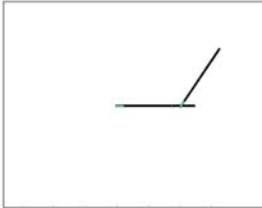   |    |
| B |    |    |
| C |   |   |
| D |  |  |
| E |  |  |

Supplement: mbc_15_5_2116__2.pdf [file mbc_15_5_2116__2.pdf]
